# Supplementary material for: Impact of image-based motion correction on dopamine D3/D2 receptor occupancy—comparison of groupwise and frame-by-frame registration approaches
Source: PubMed Central journal article supplement (PMC4538721; doi:10.1186/s40658-015-0117-0), 2015-07-29
Supplement: 40658_2015_117_MOESM1_ESM.pdf [file 40658_2015_117_MOESM1_ESM.pdf]

## Supplementary Material

The two-site competitive binding model used in this work including corrections for PHNO mass dose effect at D3 sites and cerebellum specific binding is given by

$$BP_{ND}^{drug} = \frac{BP_{ND}^{base} \left( \frac{f_{PHNO}^{D3}}{1 + \frac{C_p^{drug}}{EC_{50}^{drug,D3}} + \frac{D^{PHNO}}{ED_{50}^{PHNO,D3}}} + \frac{1 - f_{PHNO}^{D3}}{1 + \frac{C_p^{drug}}{EC_{50}^{drug,D2}}} \right) - BP_{ND}^{base,CER} \left( \frac{f_{PHNO}^{D3,CER}}{1 + \frac{C_p^{drug}}{EC_{50}^{drug,D3}} + \frac{D^{PHNO}}{ED_{50}^{PHNO,D3}}} + \frac{1 - f_{PHNO}^{D3,CER}}{1 + \frac{C_p^{drug}}{EC_{50}^{drug,D2}}} \right)}{1 + BP_{ND}^{base,CER} \left( \frac{f_{PHNO}^{D3,CER}}{1 + \frac{C_p^{drug}}{EC_{50}^{drug,D3}} + \frac{D^{PHNO}}{ED_{50}^{PHNO,D3}}} + \frac{1 - f_{PHNO}^{D3,CER}}{1 + \frac{C_p^{drug}}{EC_{50}^{drug,D2}}} \right)}$$

where  $BP_{ND}^{base}$  is the true baseline binding potential in the target tissue,  $BP_{ND}^{drug}$  is the binding potential following drug administration,  $C_p^{drug}$  is the plasma concentration of drug (GSK618334) measured, and  $D^{PHNO}$  is the total mass dose of (+)-PHNO (ug/kg) administered.  $f_{PHNO}^{D3}$  is the regional fraction of baseline [11C]-(+)-PHNO  $BP_{ND}$  corresponding to D3 binding with values of 0.87 for SN, 0.66 for GP, 0.39 for VST, 0.69 for TH, 0.21 for CD, 0.14 for PU,  $ED_{50}^{PHNO,D3}$  is the mass dose of (+)-PHNO that results in 50% occupancy of the D3 receptor with the value of 0.04ug/kg.<sup>20</sup>  $EC_{50}^{drug,D3}$  and  $EC_{50}^{drug,D2}$  are the plasma concentrations of the drug (GSK618334) that would result in 50% occupancy of D3 and D2 receptors, respectively, estimated using the nonlinear least-squares optimiser 'lsqnonlin' provided in Matlab R2008b (The MathWorks Inc, Natick, MA, USA).
